# Supplementary material
Source: PubMed Central journal article supplement (PMC11114442)

# PRISMA Diagram of Post-Separation Abuse Literature Review Search

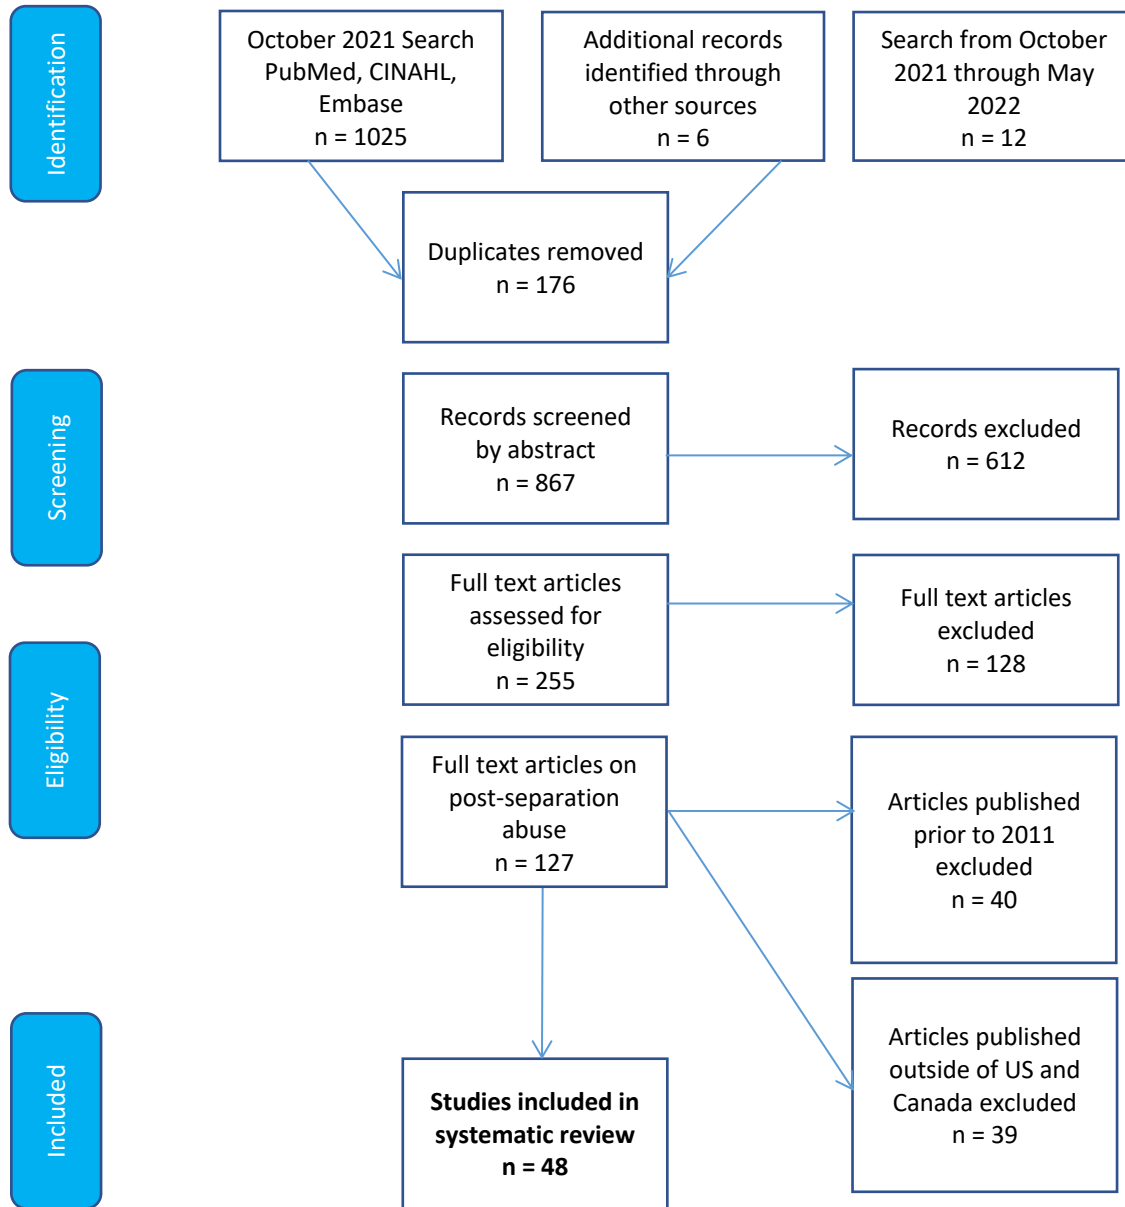

Supplement: NIHMS1875457-supplement-PRISMA_Diagram.pdf [file NIHMS1875457-supplement-PRISMA_Diagram.pdf]
